# Supplementary material
Source: ML conference proceedings conference paper supplement (https://openaccess.thecvf.com/content/CVPR2022/html/Zhang_One-Bit_Active_Query_CVPR_2022_paper.html)
Supplement: Supplementary file 1 [file Zhang_One-Bit_Active_Query_CVPR_2022_supplemental.pdf]

## Supplementary Material for One-bit Active Query with Contrastive Pairs

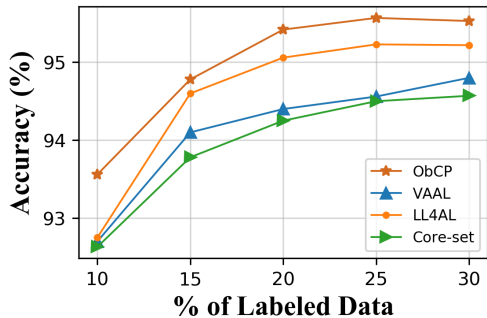

Figure 1. The comparison results of image classification on the SVHN dataset.

### 1. SVHN

We conduct ObCP on another image classification benchmark SVHN [2] to further demonstrate its effectiveness. The SVHN dataset is a real-world image dataset which is obtained from house numbers in Google Street View images. Specifically, it contains 10 classes and has 73257 images used for training while 26032 for testing.

**Baseline Methods.** We compare ObCP against several well-known methods, which including VAAL [4], LL4AL [5] and Core-set [3]. All methods are performed under the same Res-18 architecture.

**Implementation Detail.** We did not carefully choose the hyper-parameters for this experiment, all parameters are just follow what we used for CIFAR10/100 experiments, and we employ ResNet-18 [1] as the backbone for fair comparison.

**Results.** The comparison results of performance are shown in Figure 1. It can be observed that our method outperforms other baselines at each active cycles by a clear margin. Specifically, we obtain an accuracy of 94.78% with 15% labels, even better than the VAAL and Core-set with 30% labels. Besides, the accuracy will be improved to 95.53% when using 30% labels, which surpass the previous best baseline LL4AL by  $\sim 0.3\%$ .

### References

- [1] Kaiming He, Xiangyu Zhang, Shaoqing Ren, and Jian Sun. Deep residual learning for image recognition. In *CVPR*, 2016. 1
- [2] Y Netzer, T Wang, A Coates, A Bissacco, B Wu, and AY Ng. Reading digits in natural images with unsupervised feature learning. *NIPS Workshop on Deep Learning and Unsupervised Feature Learning*, 2011. 1
- [3] Ozan Sener and Silvio Savarese. Active learning for convolutional neural networks: A core-set approach. In *ICLR*, 2018. 1
- [4] Samarth Sinha, Sayna Ebrahimi, and Trevor Darrell. Variational adversarial active learning. In *ICCV*, October 2019. 1
- [5] Donggeun Yoo and In So Kweon. Learning loss for active learning. In *CVPR*, June 2019. 1
